# Supplementary material for: 3D voluminometry of urolithiasis as a predictor of success in ureterorenoscopic (URS) treatment
Source: Springer Nature journal article supplement (doi:10.1007/s13629-022-00361-2), 2022-06-30
Supplement: MOESM1 [file 23227416]

# Electronic Supplemental material

| **Table 1. Logistic regression analysis on the effect of the *mean stone axis (AvgA)* measurement on stone free status 4 weeks after URS, need for secondary procedure and the occurrence of complications, accounted for stone position** | | | | | | |
| --- | --- | --- | --- | --- | --- | --- |
| ***Predictor*** | ***SFS 4 weeks post URS*** | | ***Secondary procedure*** | | ***Complications*** | |
|  | **OR (95% CI)** | ***p*** | **OR (95% CI)** | ***p*** | **OR (95% CI)** | ***p*** |
| Mean stone axis, mm | 0.904  (0.792-1.031) | 0.132 | 1.028  (0.893-1.183) | 0.700 | 0.890  (0.759-1.043) | 0.186 |
|  |  |  |  |  |  |  |
| Position |  | **0.012** |  | **0.022** |  | 0.250 |
| - Distal | 3.226  (1.479-7.035) | **0.003** | 0.302  (0.129-0.711) | **0.006** | 0.435  (0.160-1.179) | 0.102 |
| - Proximal | 2.082  (0.948-4.570) | 0.068 | 0.620  (0.274-1.403) | 0.251 | 0.559  (0.200-1.563) | 0.268 |
| - Renal | 1.0 (ref) |  | 1.0 (ref) |  | 1.0 (ref) |  |
| CI = confidence interval, ref = reference category, SFS = stone-free status; OR: odds ratio  *p*-value < 0.05 is considered statistically significant. | | | | | | |
