# Supplementary material for: 3D voluminometry of urolithiasis as a predictor of success in ureterorenoscopic (URS) treatment
Source: Springer Nature journal article supplement (doi:10.1007/s13629-022-00361-2), 2022-06-30
Supplement: MOESM2 [file 23227416]

# Electronic Supplemental material

| **Table 2.  Logistic regression analysis on the effect of the *manual (2D) volume* measurement on stone free status 4 weeks after URS, need for secondary procedure and the occurrence of complications, accounted for stone position** | | | | | | |
| --- | --- | --- | --- | --- | --- | --- |
| ***Predictor*** | ***SFS 4 weeks post URS*** | | ***Secondary procedure*** | | ***Complications*** | |
|  | **OR (95% CI)** | ***p*** | **OR (95% CI)** | ***p*** | **OR (95% CI)** | ***p*** |
| Manual Volume 2D, per 10 mm³ | 0.992  (0.979-1.005) | 0.238 | 0.997  (0.997-1.012) | 0.649 | 0.967  (0.931-1.004) | 0.081 |
|  |  |  |  |  |  |  |
| Position |  | **0.007** |  | **0.011** |  | 0.160 |
| - Distal | 3.404  (1.573-7.366) | **0.002** | 0.274  (0.118-0.638) | **0.003** | 0.389  (0.145-1.049) | 0.062 |
| - Proximal | 2.120  (0.963-4.644) | 0.062 | 0.571  (0.252-1.294) | 0.179 | 0.493  (0.175-1.387) | 0.180 |
| - Renal | 1.0 (ref) |  | 1.0 (ref) |  | 1.0 (ref) |  |
| CI = confidence interval, ref = reference category, SFS = stone-free status; OR: odds ratio  *p*-value < 0.05 is considered statistically significant | | | | | | |
